# Supplementary material
Source: PubMed Central journal article supplement (PMC2671235)
Supplement: NIHMS101870-supplement-1_si_001.pdf [file NIHMS101870-supplement-1_si_001.pdf]

## ELECTRONIC SUPPLEMENT

***“Annexin I and Annexin II N-terminal Peptides Binding to S100 Protein Family Members: Specificity and Thermodynamic Characterization”*** by Werner W. Streicher, Maria M. Lopez and George I. Makhatadze

**Supplementary Table S1:** Summary of AnI and AnII interactions with S100 protein family members using intrinsic Trp to screen for binding for AnI and ITC for AnII.

| Protein    | Trp Fluor.             |                        | ITC                     |                         |
|------------|------------------------|------------------------|-------------------------|-------------------------|
|            | AnI + Ca <sup>2+</sup> | AnI - Ca <sup>2+</sup> | AnII + Ca <sup>2+</sup> | AnII - Ca <sup>2+</sup> |
| S100A1     | -                      | -                      | -                       | -                       |
| S100A2     | **                     | -                      | -                       | -                       |
| S100A3     | -                      | -                      | -                       | -                       |
| S100A4     | -                      | -                      | -                       | -                       |
| S100A5     | -                      | -                      | -                       | -                       |
| S100A6     | Binding*               | -                      | -                       | -                       |
| S100A7     | -                      | -                      | -                       | -                       |
| S100A8     | -                      | -                      | -                       | -                       |
| S100A9     | -                      | -                      | -                       | -                       |
| S100A10    | -                      | -                      | Binding                 | Binding                 |
| S100A11    | Binding*               | -                      | Binding                 | -                       |
| S100A12    | -                      | -                      | -                       | -                       |
| S100A13    | -                      | -                      | -                       | -                       |
| S100B      | -                      | -                      | -                       | -                       |
| S100P      | -                      | -                      | -                       | -                       |
| S100Z      | -                      | -                      | -                       | -                       |
| Calmodulin | **                     | -                      | -                       | -                       |

- represents no detectable binding;

\* confirmed using ITC;

\*\* small changes in fluorescence emission spectra have been observed by the interaction could not be confirmed by ITC.

**Supplementary Table S2:** Thermodynamic parameters determined using ITC for AnI and AnII binding their respective S100 protein binding partners.

| Peptide | Protein         | Temperature<br>(°C) | $K_{d1}$<br>( $\mu$ M) | $\Delta H_1$<br>(kJ/mol) | $K_{d2}$<br>( $\mu$ M) | $\Delta H_2$<br>(kJ/mol) |
|---------|-----------------|---------------------|------------------------|--------------------------|------------------------|--------------------------|
| AnI     | S100A11         | 15                  | 2.7                    | -4                       |                        |                          |
|         |                 | 20                  | 4.6                    | -11                      |                        |                          |
|         |                 | 25                  | 5.4                    | -15                      |                        |                          |
|         |                 | 30                  | 6.5                    | -22                      |                        |                          |
|         |                 | 35                  | 7.2                    | -30                      |                        |                          |
|         | S100A6          | 10                  | 16.0                   | 14                       |                        |                          |
|         |                 | 15                  | 15.7                   | 11                       |                        |                          |
|         |                 | 20                  | 10.1                   | 6                        |                        |                          |
|         |                 | 25                  | ND                     | 0                        |                        |                          |
|         |                 | 30                  | 9.3                    | -8                       |                        |                          |
| AnII    | S100A10         | 10                  | 0.6                    | -53                      | 0.8                    | 1                        |
|         |                 | 10 <sup>a</sup>     | 0.7                    | -54                      | 0.8                    | 1                        |
|         |                 | 15                  | 0.1                    | -63                      | 0.2                    | -14                      |
|         |                 | 20                  | 1.1                    | -93                      | 0.7                    | -18                      |
|         |                 | 25                  | 0.8                    | -100                     | 0.6                    | -36                      |
|         |                 | 30                  | 0.1                    | -97                      | 0.2                    | -49                      |
|         |                 | 30 <sup>a</sup>     | 0.1                    | -101                     | 0.3                    | -51                      |
|         |                 | S100A11             | 6 <sup>b</sup>         | 3.9                      | 31                     | 9.7                      |
|         | 6               | 1.9                 | 31                     | 11.5                     | 20                     |                          |
|         | 10 <sup>b</sup> | 1.8                 | 29                     | 11.3                     | 18                     |                          |
|         | 10              | 0.9                 | 28                     | 7.6                      | 21                     |                          |
|         | 15              | 0.9                 | 21                     | 6.8                      | 17                     |                          |
|         | 20 <sup>b</sup> | 1.0                 | 9                      | 8.4                      | 11                     |                          |
|         | 25              | ND                  |                        |                          |                        |                          |

<sup>a</sup> experiments performed in the absence of calcium;

<sup>b</sup> experiments performed in the presence 100 mM NaCl

Errors in enthalpies are ~10%. Average values for dissociation constants are: S100A6 AnI: 13±4  $\mu$ M; S100A11 AnI: 5±2  $\mu$ M; S100A10 AnII:  $K_{d1}$ : 0.5±0.4  $\mu$ M;  $K_{d2}$ : 0.5±0.3  $\mu$ M; S100A11 AnII:  $K_{d1}$ : 2±1  $\mu$ M;  $K_{d2}$ : 9±2  $\mu$ M.
